# Supplementary material for: Electrospun Fibers Loaded with Pirfenidone: An Innovative Approach for Scar Modulation in Complex Wounds
Source: MDPI journal article supplement (doi:10.3390/polym15204045), 2023-10-10
Supplement: s1 [file s1]

## Supplementary Materials

# Electrospun Fibers Loaded with Pirfenidone: An Innovative Approach for Scar Modulation in Complex Wounds

Erika Maria Tottoli <sup>1</sup>, Laura Benedetti <sup>2,3</sup>, Federica Riva <sup>4</sup>, Enrica Chiesa <sup>1</sup>, Silvia Pisani <sup>1</sup>, Giovanna Bruni <sup>5</sup>, Ida Genta <sup>1,3</sup>, Bice Conti <sup>1,3</sup>, Gabriele Ceccarelli <sup>2,3</sup> and Rossella Dorati <sup>1,\*</sup>

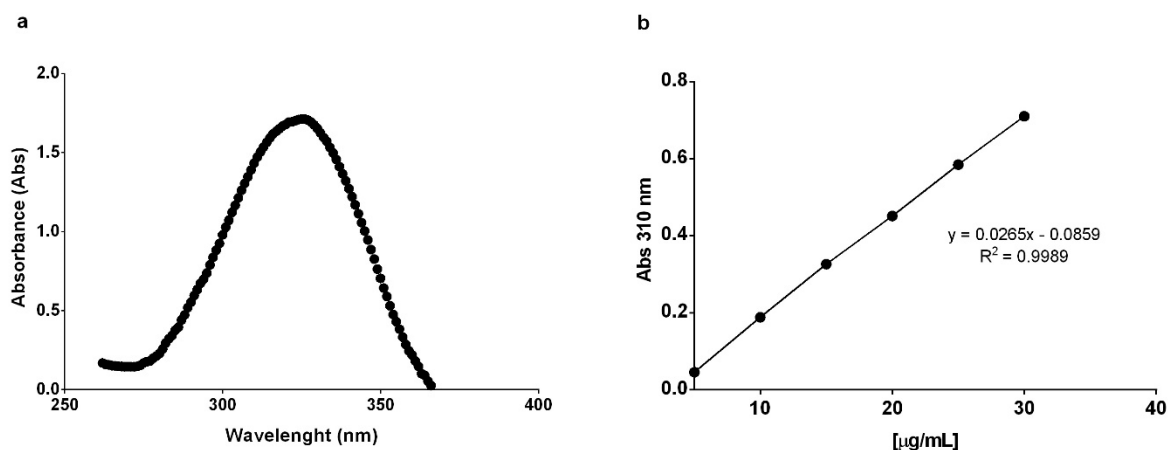

**Figure S1.** UV-Vis spectrum of Pirfenidone standard solution in PBS 1 X pH 7.4 (20.0 µg/mL) (a). Pirfenidone UV-Vis calibration curve at different concentration (5-30 µg/mL) measured at 310 nm (b). Standard deviations are not noticeable as <0.01, plot b.

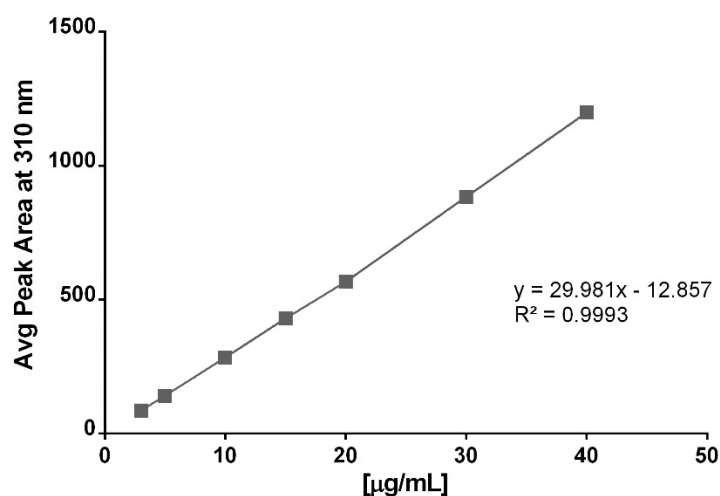

**Figure S2.** Calibration curve of PF solutions of different concentrations (3.0-40 µg/mL) measured at 310 nm at 25°C. Standard deviations are not noticeable as <5.00.

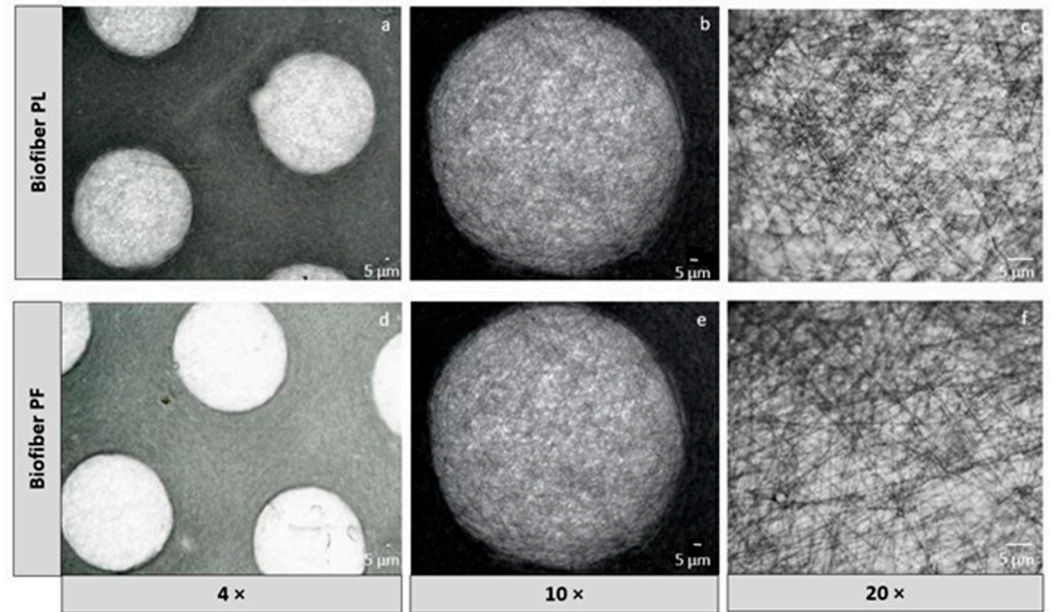

**Figure S3.** Optical microscope images at different magnifications (4, 20 and 20 ×) of placebo (Biofiber PL, a-c), and advanced medicated dressing loaded with Pirfenidone 1.5% w/w (Biofiber PF, d-f).

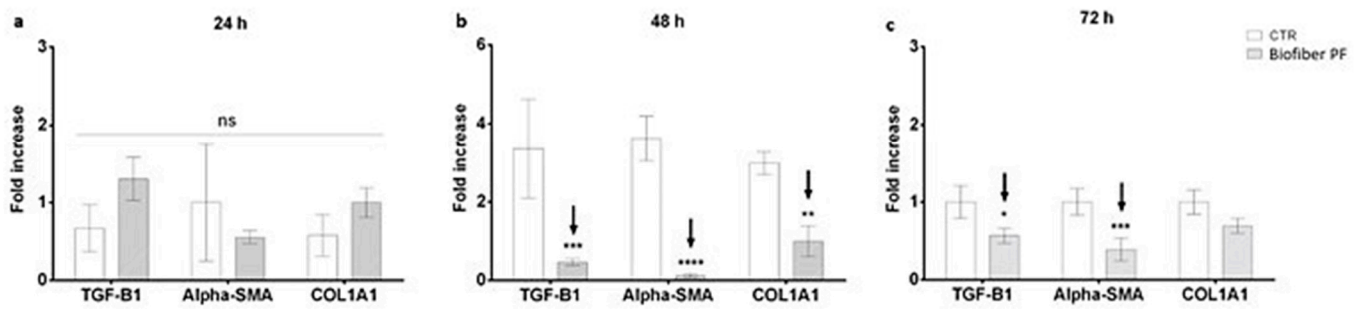

**Figure S4.** Gene expression analysis of HSF treated with Biofiber for 24, 48 and 72 h. (a) qRT-PCR at 24 h. (b) qRT-PCR at 48 h. (c) qRT-PCR at 72 h. Results are normalized to the housekeeping gene (Glyceraldehyde-3-Phosphate Dehydrogenase (GAPDH)). Statistically significant values are indicated as \*  $p < 0.05$ , \*\*  $p < 0.01$ , \*\*\*  $p < 0.001$ , \*\*\*\*  $p < 0.0001$ . Analysis of variance test was performed to evaluate data significance.
